# Supplementary material for: Molecular fingerprinting of particulate organic matter as a new tool for its source apportionment: changes along a headwater drainage in coarse, medium and fine particles as a function of rainfalls
Source: Copernicus journal article supplement (doi:10.5194/bg-15-973-2018), 2018-02-19
Supplement: Supplementary file 1 [file bg-15-973-2018-supplement.zip]

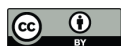

## *Supplement of*

# **Molecular fingerprinting of particulate organic matter as a new tool for its source apportionment: changes along a headwater drainage in coarse, medium and fine particles as a function of rainfalls**

**Laurent Jeanneau et al.**

*Correspondence to:* Laurent Jeanneau ([laurent.jeanneau@univ-rennes1.fr](mailto:laurent.jeanneau@univ-rennes1.fr))

- [bg-15-973-2018-supplement-title-page.pdf](#)
- [Data.ods](#)
- [Supplements.pdf](#)

The copyright of individual parts of the supplement might differ from the CC BY 4.0 License.
